# Supplementary material for: The stability of graphene and boron nitride for III-nitride epitaxy and post-growth exfoliation
Source: Royal Society of Chemistry journal article supplement (doi:10.1039/d1sc01642c), 2021-01-01
Supplement: d1sc01642c1.pdf [file d1sc01642c1.pdf]

## Experimental Section

**Graphene transfer:** The synthesized graphene/copper/graphene (g/Cu/g) received from LG Electronics was transferred by the normal wet transfer method. G/Cu/g was coated by polymethyl methacrylate (PMMA) at 3,000 rpm for 20 s, and Cu foil was etched by FeCl<sub>3</sub> for 1 h. After that, PMMA was removed in acetone. Al<sub>2</sub>O<sub>3</sub> substrate and AlN template were purchased from Hi-Solar Co., Ltd. AlN template was grown on conventional two-step method by MOCVD. Over 900 °C, AlN buffer was grown on *c*-plane Al<sub>2</sub>O<sub>3</sub> and crystalline AlN was grown on buffer layer over 1,250 °C. The growth rate of AlN was 10 μm/h.

**H-BN growth:** 2-D h-BN layers were epitaxially grown on about 200-nm-thick AlN films on *c*-plane Al<sub>2</sub>O<sub>3</sub> substrates by MOCVD (SH4001-HTA, EpiQuest), where AlN films were fabricated by sputtering and high temperature annealing process.<sup>1</sup> As previously reported,<sup>2-3</sup> the growth was conducted using a pulsed-mode method, in which triethylboron and NH<sub>3</sub> as B and N sources, respectively, were alternatingly supplied into the reactor with a nominal V/III ratio of 3,000. The temperature of 1,380 °C and the pressure of 29 Torr were maintained during growth. Finally, around 5 nm layered BN films were grown by tuning the growth pulse as confirmed in our previous report.<sup>4</sup>

**Annealing:** Graphene and h-BN were annealed at target temperature for 10 min in H<sub>2</sub> ambient (18 SLM) and 200 Torr by MOCVD that was used for h-BN growth experiments in this study. Considering the decomposition temperature, we selected target temperature as 1,100, 1,200, 1,300, and 1,400 °C. The target temperature was raised over 14.5, 16, 17 and 17.5 min respectively.

**AlN growth on h-BN/AlN:** Around 800 nm AlN layers were grown on h-BN/AlN by two step process. First step is nucleation at 1,150 °C with a V/III ratio of 8,500 followed by crystalline growth at 1,300 °C with a V/III ratio of 325. The process pressure was maintained at 37.5 Torr during growth.

**AlN growth on h-BN/sapphire:** Around 480 nm AlN layers were grown on *c*-plane Al<sub>2</sub>O<sub>3</sub> and h-BN/*c*-plane Al<sub>2</sub>O<sub>3</sub> substrates at 1,380 °C with a V/III ratio of 450. The process pressure was maintained at 29 Torr during growth.

**Measurement:** Graphene samples were analyzed by micro-Raman spectroscopy system equipped with a 514 nm wavelength laser (RENISHAW inVia), SEM (SU-9000, Hitachi), AFM (NanoNavi IIs, SII Nano-Technology), and XPS equipped with an Al-K Alpha

source gun (NEXSA, Thermo Fisher Scientific). The XPS measuring area had an elliptical shape with a long axis of 450  $\mu\text{m}$  and a short axis of 300  $\mu\text{m}$ , and the measurement depth was about 10 nm. Fourier transform infrared (FTIR, FTIR-6100, JASCO) reflectance spectra of the h-BN samples were taken at room temperature in the wavenumber between 600  $\text{cm}^{-1}$  and 1500  $\text{cm}^{-1}$  with a resolution of 4  $\text{cm}^{-1}$ . All spectra were normalized by the reflectance spectrum of an aluminum mirror.

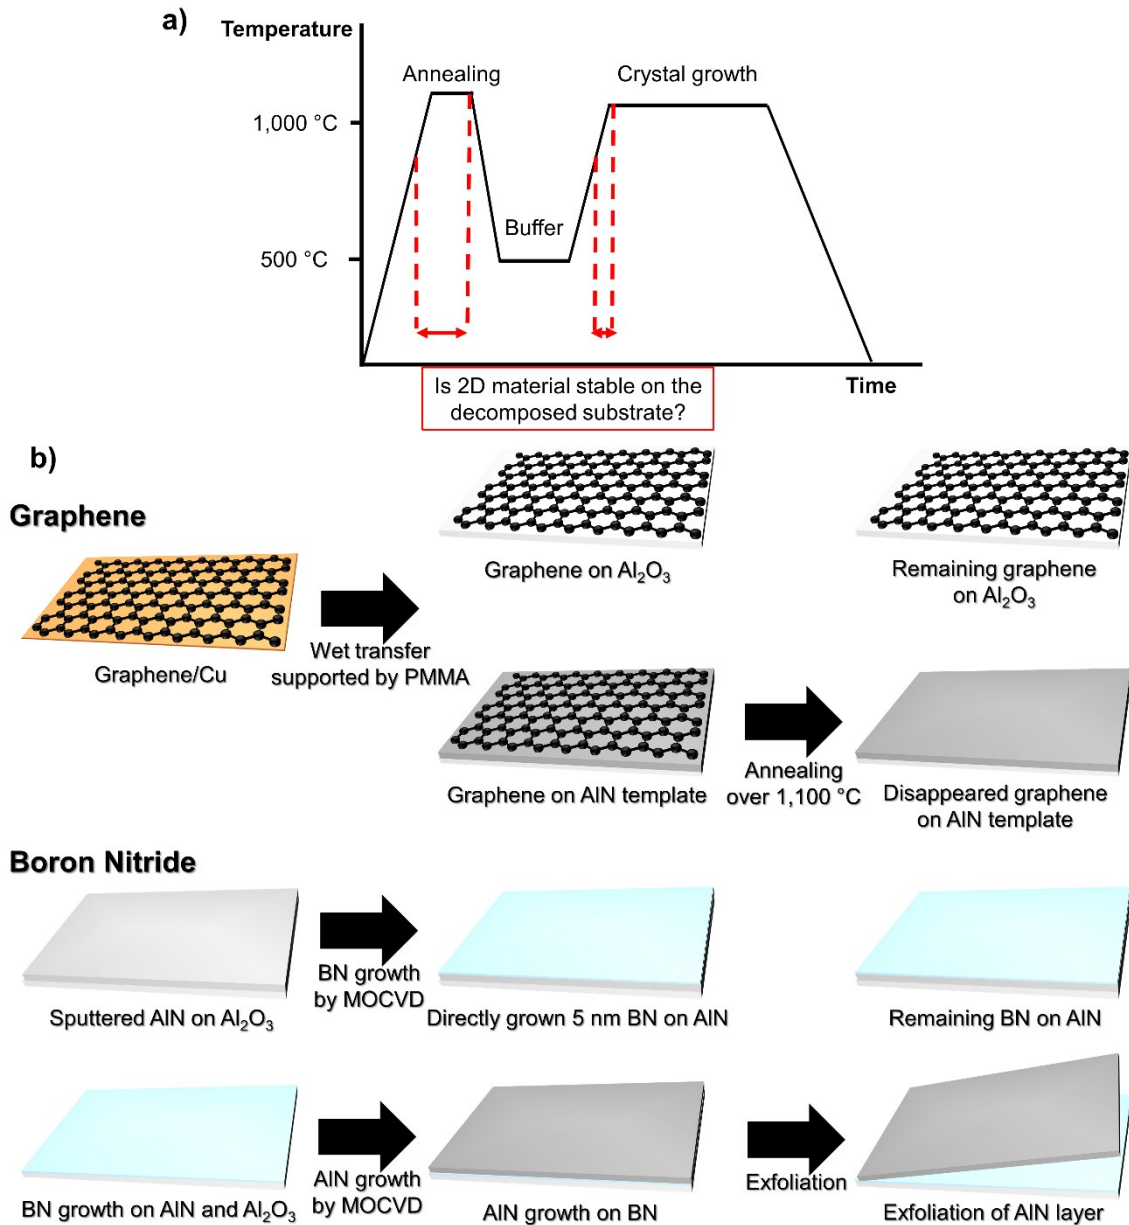

Figure S1. a) Conventional GaN two-step process including a buffer and crystal growth system.<sup>5</sup> The growth temperature of crystal GaN is higher than its decomposition temperature point, which may influence the 2-D material if GaN is used as a substrate to support the 2-D material, e.g., the GaN/graphene/GaN structure. b) Schematic of the sample preparation process. Transferred graphene on  $\text{Al}_2\text{O}_3$  and AlN template by the wet transfer method and the epitaxially grown BN film on AlN. Each sample was annealed over  $1,100^\circ\text{C}$  by MOCVD. AlN growth on h-BN/AlN and h-BN/ $\text{Al}_2\text{O}_3$  and its exfoliation caused by the surviving h-BN layer.

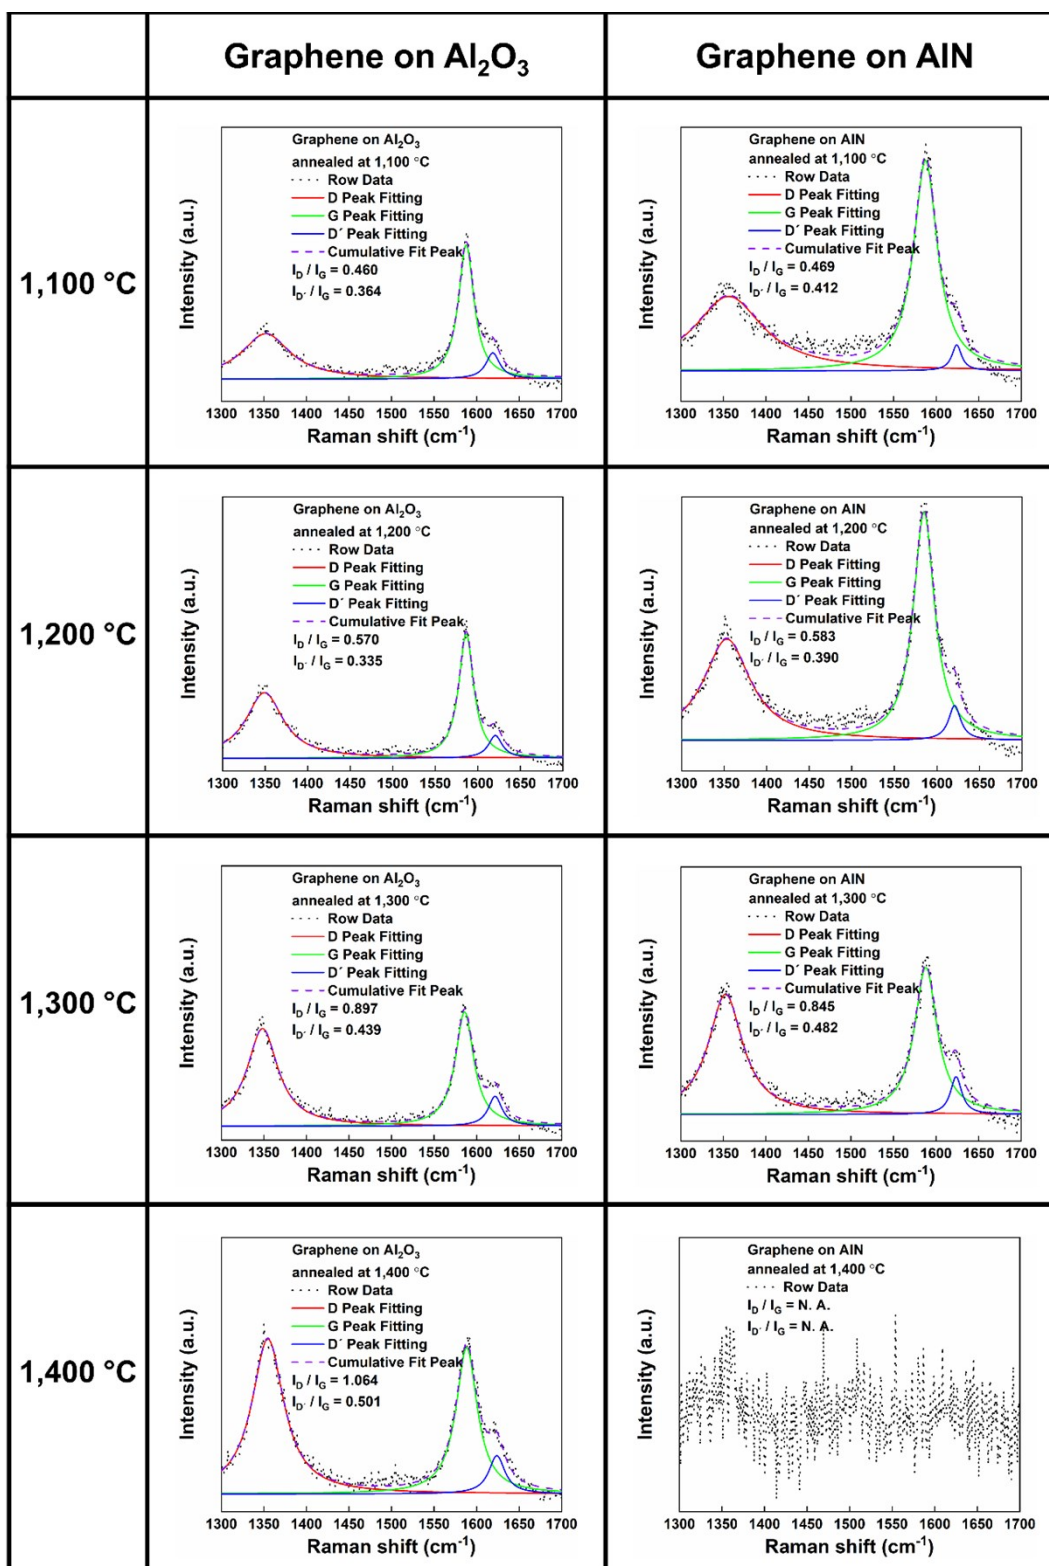

Figure S2. Fitted Raman spectra of graphene on Al<sub>2</sub>O<sub>3</sub> and AlN at each temperature. The fitted data exhibit D, D', and 2D peaks at 1,350, 1,580, and 1,650 cm<sup>-1</sup>, respectively. Regarding graphene on AlN annealed at 1,300 °C, it is fitted by P2 as shown in Figures S4. There is no peak for graphene on AlN annealed at 1,400 °C.

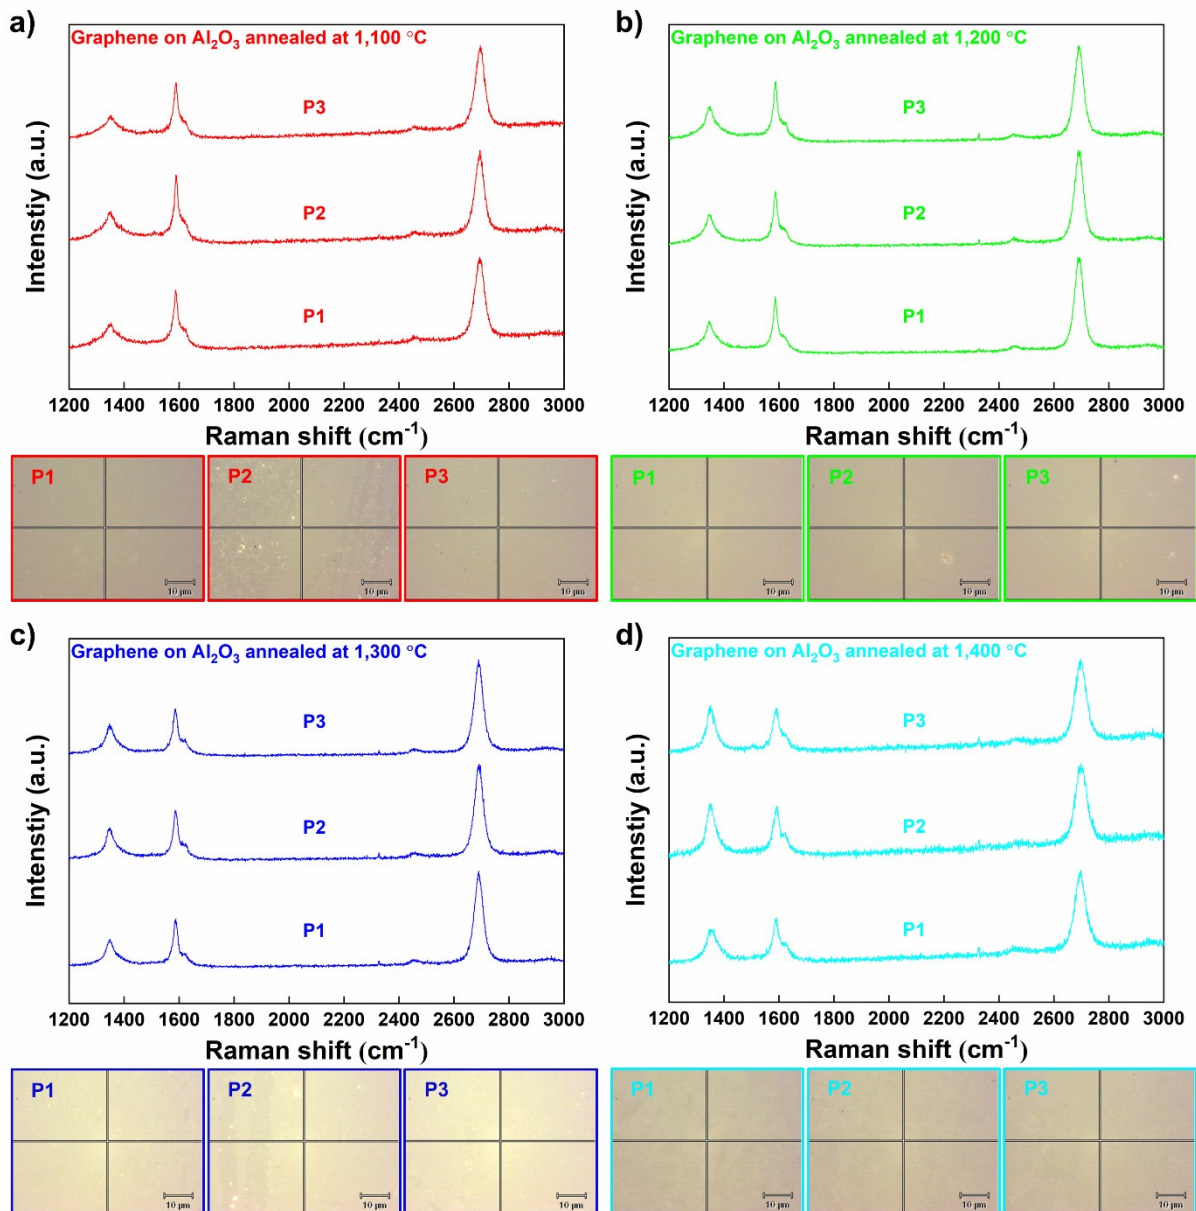

Figure. S3. Raman spectra of graphene on Al<sub>2</sub>O<sub>3</sub> annealed at various temperatures for 10 min in H<sub>2</sub> ambient, i.e., at a) 1,100 °C; b) 1,200 °C; c) 1,300 °C; and d) 1,400 °C. Inset images in each figure show the measurement points.

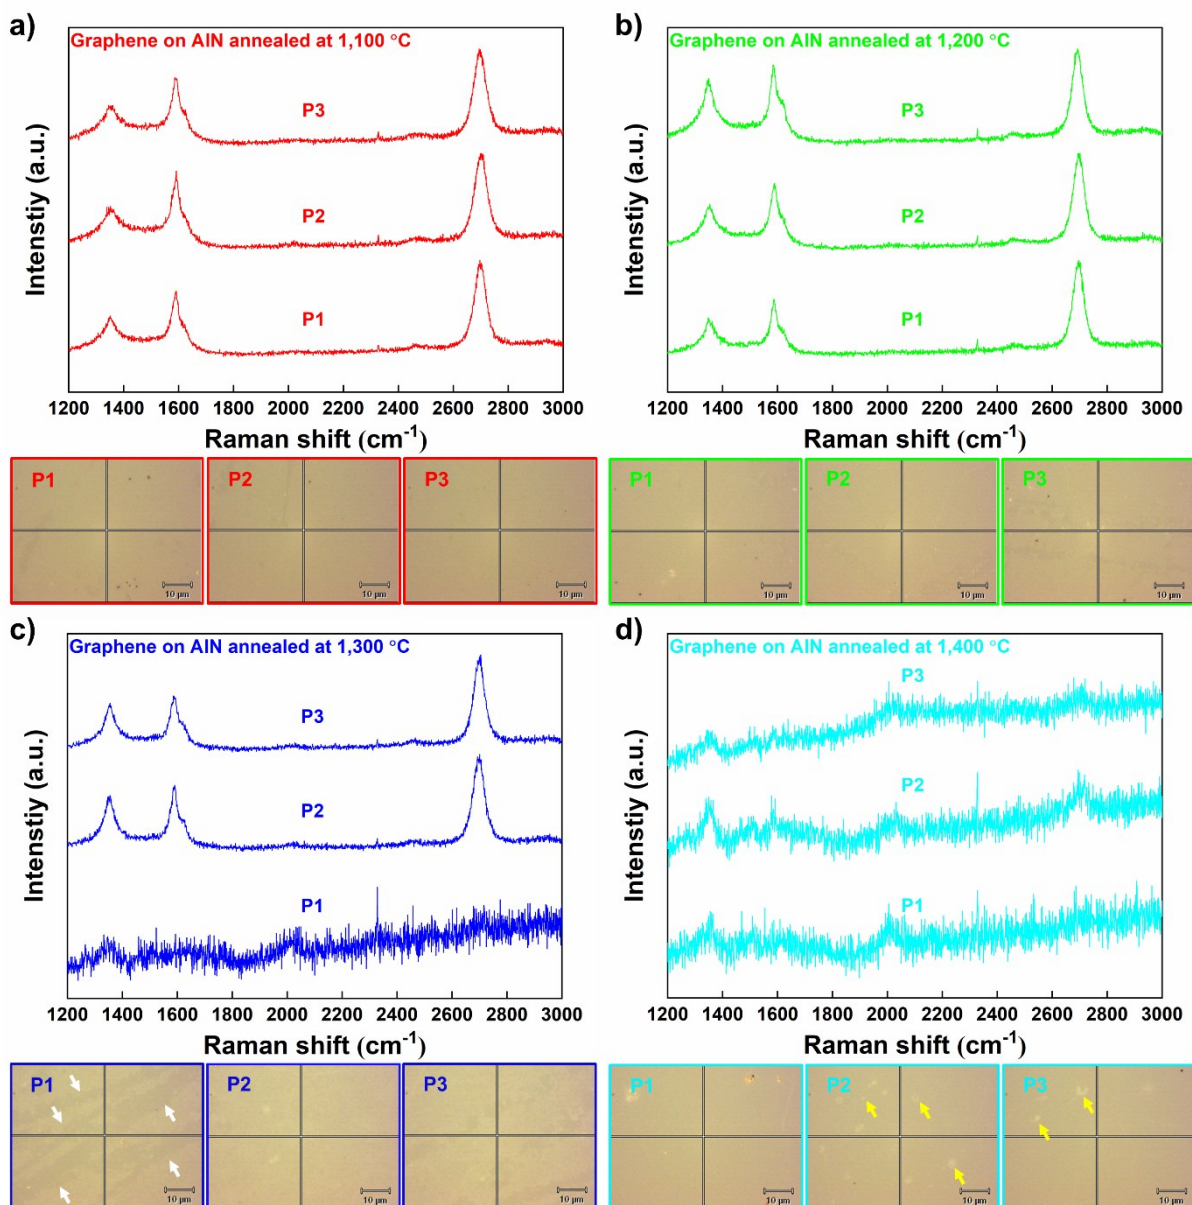

Figure. S4. Raman spectra of graphene on AlN annealed at various temperatures for 10 min in H<sub>2</sub> ambient, i.e., at a) 1,100 °C; b) 1,200 °C; c) 1,300 °C; and d) 1,400 °C. Inset images in each figure show the measurement points. The white and yellow arrows mean graphene-loss and remaining graphene, respectively.

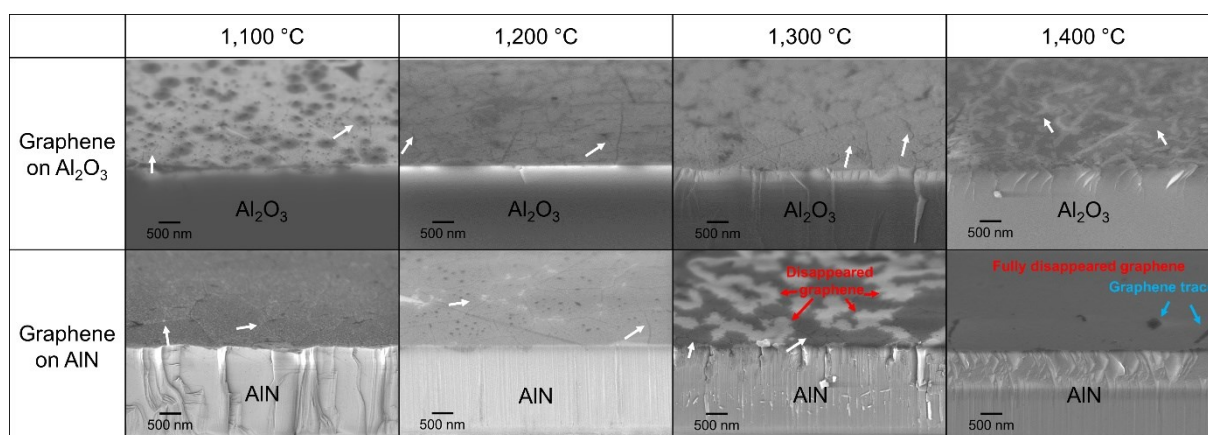

Figure. S5. SEM images of annealed graphene on Al<sub>2</sub>O<sub>3</sub> and AlN. White, red, and blue arrows indicate graphene wrinkles, graphene-loss, and graphene trace, respectively.

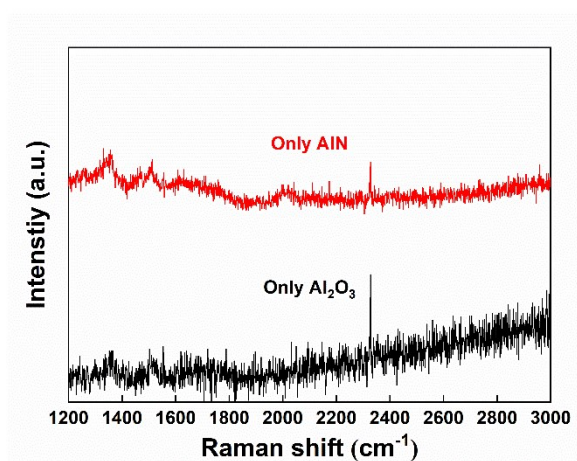

Figure. S6. Raman spectra of bare Al<sub>2</sub>O<sub>3</sub> and AlN.

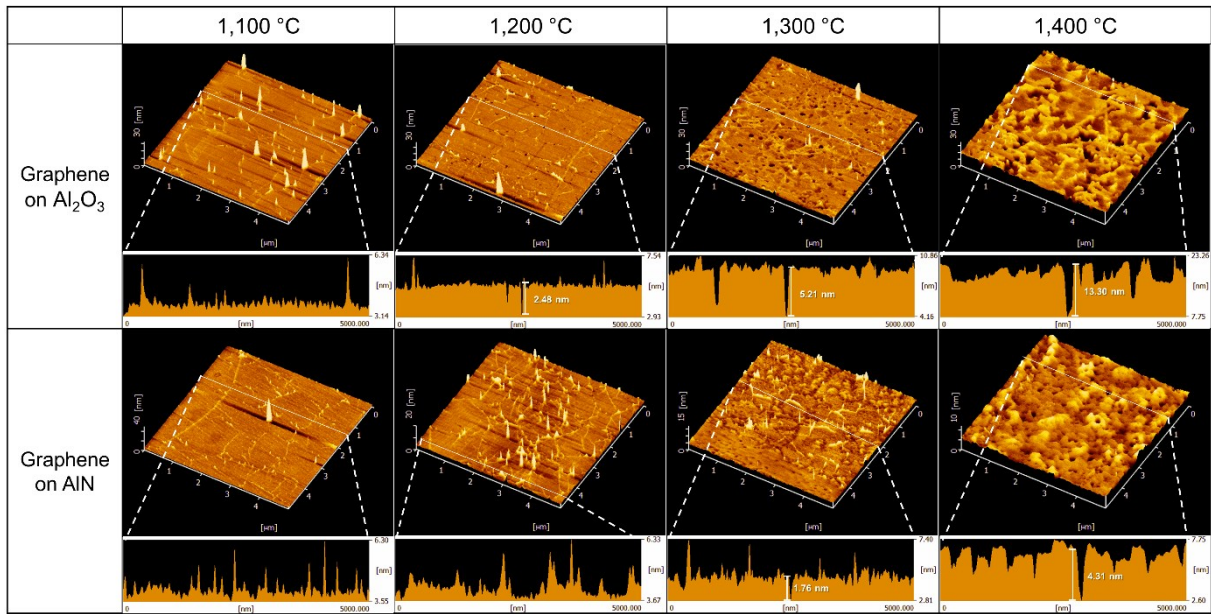

Figure. S7. Tilted AFM image of annealed graphene on each substrate and the void depth.



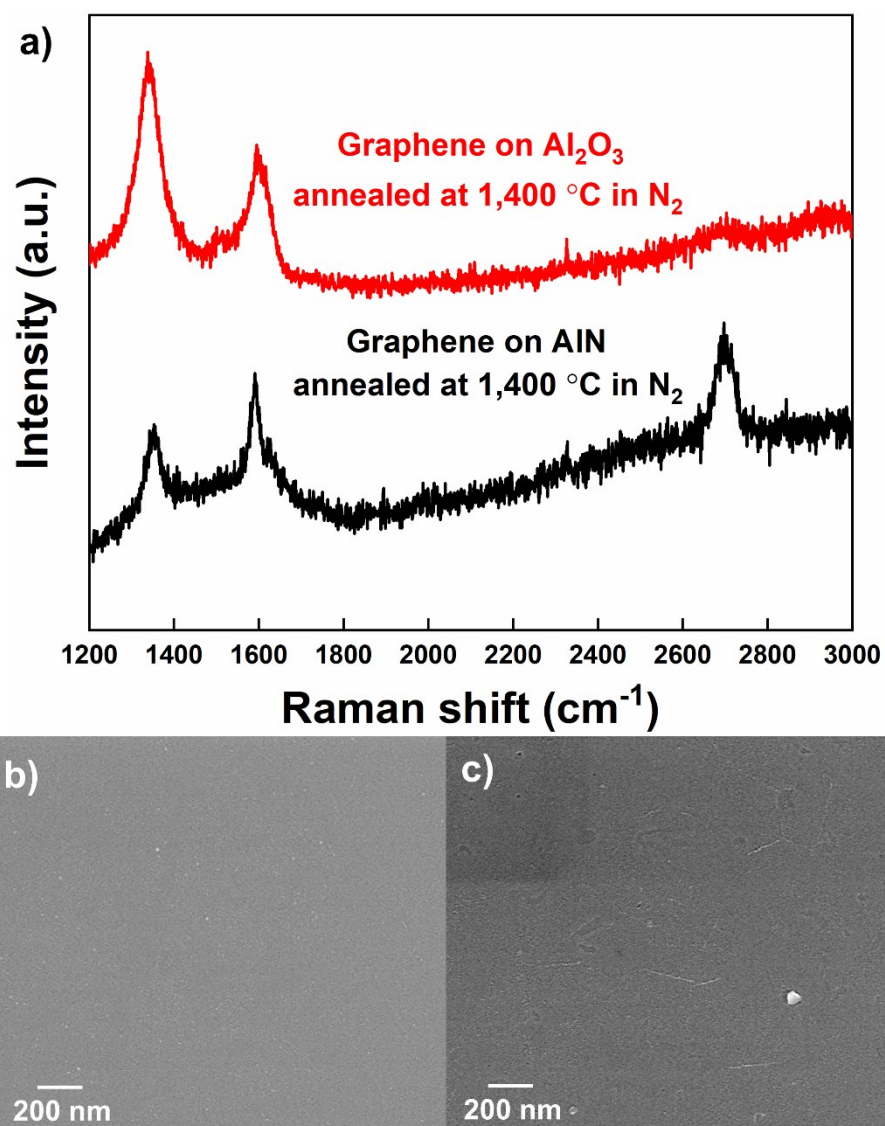

Figure. S8. Annealed graphene at 1,400 °C in N<sub>2</sub> ambient on each substrate. a) Raman spectra of graphene on Al<sub>2</sub>O<sub>3</sub> and AlN. Top view SEM image of b) graphene on Al<sub>2</sub>O<sub>3</sub> and c) graphene on AlN.

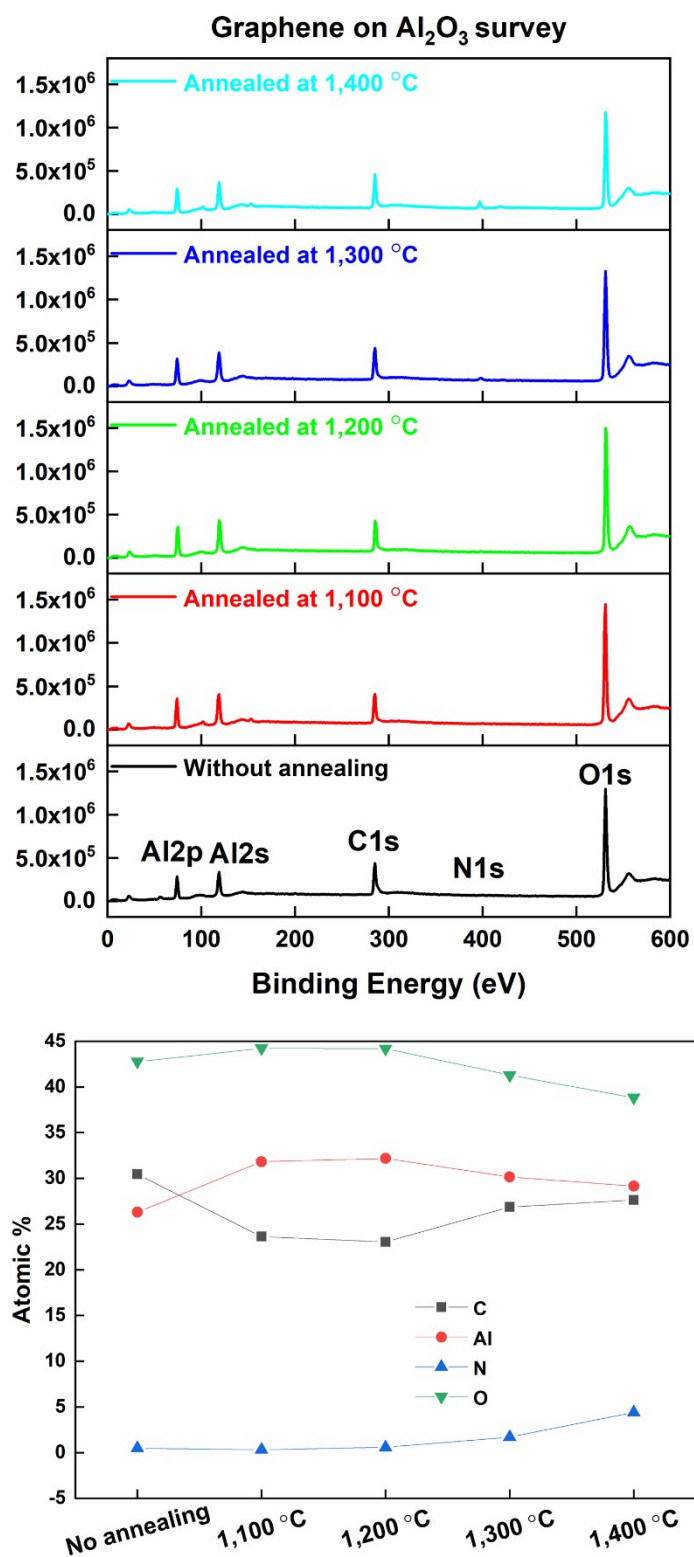

Figure. S9. XPS data for graphene on decomposed Al<sub>2</sub>O<sub>3</sub> and its total atomic percentage. Although Al<sub>2</sub>O<sub>3</sub> decomposed over 1,200 °C, the amplitude of C 1s did not considerably change compared with that in Figure 2a.

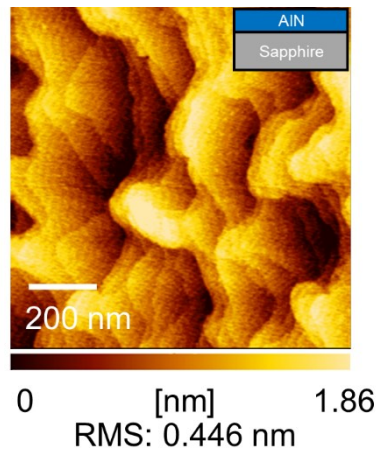

Figure. S10. Surface morphology of bare AlN layer fabricated by sputtering and high temperature annealing process.

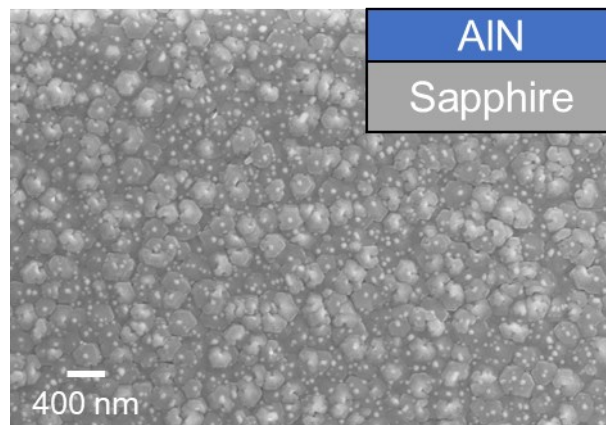

Figure. S11. Top-view SEM image of the grown AlN on *c*-plane Al<sub>2</sub>O<sub>3</sub> at 1,380 °C

## Reference

- 1 H. Miyake, C. -H. Lin, K. Tokoro, K. Hiramatsu, *J. Cryst. Growth* **2016**, *456*, 155-159.
- 2 X. Yang, S. Nitta, K. Nagamatsu, S. -Y. Bae, H. -J. Lee, Y. Liu, M. Pristovsek, Y. Honda, H. Amano, *J. Cryst. Growth* **2018**, *482*, 1-8.
- 3 X. Yang, S. Nitta, M. Pristovsek, Y. Liu, K. Nagamatsu, M. Kushimoto, Y. Honda, H. Amano, *Appl. Phys. Express* **2018**, *11*, 051002.
- 4 X. Yang, S. Nitta, M. Pristovsek, Y. Liu, Y. Liao, M. Kushimoto, Y. Honda, H. Amano, *2D Mater.* **2020**, *7*, 015004.
- 5 H. Amano, *Angew. Chem. Int. Ed.* **2015**, *54*, 7764.
